# Supplementary material
Source: PubMed Central journal article supplement (PMC4243343)
Supplement: ASN.2013080912_ASN2013080912SupplementaryData.pdf [file ASN.2013080912_ASN2013080912SupplementaryData.pdf]

## SUPPLEMENTAL METHODS

### Libraries construction and NGS technology

To get suitable libraries, 100 ng of the amplicons' pools was fragmented, ligated with bar-coded NGS adaptors after a size selection step, and PCR amplified (8 cycles). An initial concatenation step of the pool of the amplicons was added in the library preparation only if such a step was required to generate sequencing reads covering all along the targeted region, whatever the initial size of the amplicon (without concatenation step, too small amplicons may not be sequenced). Sequencing was performed using either the 100 or the 200 bases read length chemistry (Life Technologies).

NGS sequencing runs of series of patient libraries were performed following the manufacturer instructions using the last up-dates of kits, protocols, apparatus and software. Actually, during the 16 months of our study, library preparation protocols, sequencing protocols and primary analysis software were regularly modified (i) to follow the rapid evolution and improvements of the sequencing technologies and (ii) to get sequencing reads covering the whole targeted region.

For each run, sequencing data generated for each patient was identified with the barcode integrated during the library preparation (one specific barcode per patient). Each NGS run allowed the sequencing of 16 to 17 patients.

Base calling, demultiplexing, mapping to the human genome reference and variant calling was performed using the last update of specific tools developed by the sequencer manufacturer, with the "low" call stringency option. Each time the minimal coverage for any base was not exceeding 10X, the exon was sequenced by Sanger analysis. In addition, *COL4A4* exon 43 had to be sequenced by Sanger analysis for all patients as it was not amplified by the Multiplicom COL4A MASTR. This was due to an error in the assignation of that exon in the RefSeq (<http://www.ncbi.nlm.nih.gov/refseq/>) which was localized at the genomic position 227887227-227887221 instead of 227890526-227890518.

Bioinformatic variant analysis was performed using an in-house web interface by an investigator (PN) who had no information on the patient data. All the variants called by Ion Torrent suite were annotated and filtered with an in-house developed software system based on latest public databases (Ensembl (v70), dbSNP135, EVS (ESP6500), 1000 genomes project). All variations with an allele frequency greater than 1% in public databases were excluded automatically by our pipeline. Rare variants known in our local database were also discarded. Remaining variations were checked and filtered by visual inspection using IGV software to eliminate base-calling/alignment false positive generally at the end of the amplicon.

### Analysis of the identified variations :

Alamut software allows to collect different scores such as the coding status, the nucleotide and amino acid conservation scores and the effect of each change on the protein and splice site. The scores for missense changes (in our case for missense changes not affecting a glycine codon) were analysed with that software according to the SIFT ([http://sift.jcvi.org/www/SIFT\\_aligned\\_seqs\\_submit.html](http://sift.jcvi.org/www/SIFT_aligned_seqs_submit.html)) and PolyPhen (<http://genetics.bwh.harvard.edu/pph/>) programs to assess the effect on the amino acid changes on the protein function. The splicing effect of synonymous mutations or of mutations affecting consensus splice sequences were assessed by Alamut by using four different Softwares based on different concepts using default parameter settings, MaxEntScan<sup>41</sup>, Splice site Finder Like, Human Splicing Finder<sup>42</sup>, and NNSplice<sup>43</sup>. Variations were considered as likely pathogenic if they are nonsense or frameshift variations, large deletion/duplication, if

they affect essential splice site, and, for the missense variations, if they affect a glycine or are considered as probably damaging by the SIFT and/or the PolyPhen2 program. Other missense variations were considered as of unknown significance. Silent changes and deep intronic variations were considered as possibly pathogenic if they are predicted to affect splicing.

**LEGEND TO SUPPLEMENTARY FIGURE 1:**

IGV view of the sequence of *COL4A4* exon 28 in a control and in case #87, which shows a one base pair deletion in about 50% of the reads in case #87.

# Supplementary Figure 1

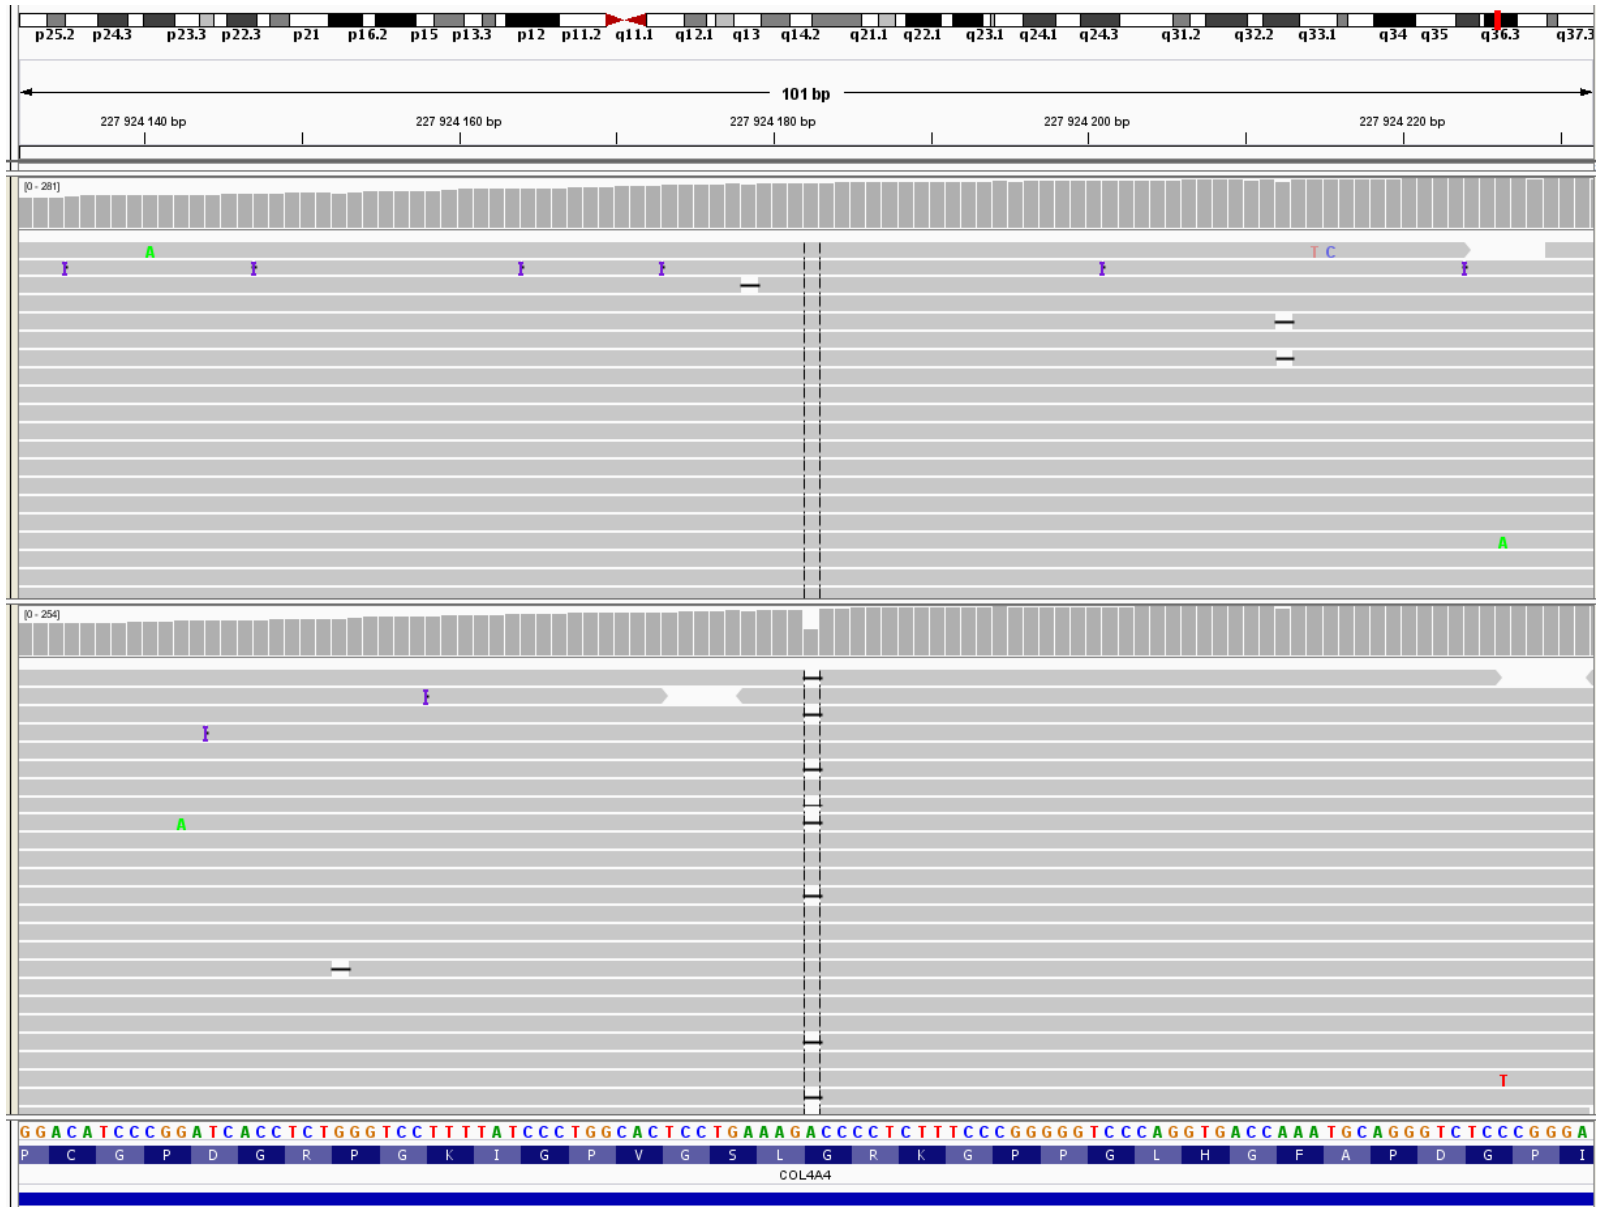

Control

Case # 87

Supplementary Table 1 : probands phenotypes and results of the molecular analysis in our cohort

| Patient #       | Sex | Age (years) | Proteinuria (age in years) | Renal failure (if ESRD, age at ESRD) | Deafness | Eye | Electron Microscopy | Immunofluorescence (with anti-a5(IV) antibodies when not precised) | Modified Flinter Score | Initially suspected mode of inheritance | Affected gene    | Nucleotide change                              | Protein change                                             | Reference                                  |
|-----------------|-----|-------------|----------------------------|--------------------------------------|----------|-----|---------------------|--------------------------------------------------------------------|------------------------|-----------------------------------------|------------------|------------------------------------------------|------------------------------------------------------------|--------------------------------------------|
| 1               | F   | 9           | Y (9)                      | NA                                   | N        | N   | NA                  | N                                                                  | 1                      | AR                                      | COL4A4           | c.[455G>A;5013_5017del]; [455G>A;5013_5017del] | p.[Gly152Glu;Glu1672Profs*17]; [Gly152Glu;Glu1672Profs*17] | this study and this study                  |
| 2               | M   | 3           | Y (3)                      | N                                    | N        | N   | NA                  | N                                                                  | 1                      | AR                                      | COL4A4           | c.[560delG]; [560delG]                         | p.[Gly187Glufs*32]; [Gly187Glufs*32]                       | this study                                 |
| 3               | M   | 34          | Y (NA)                     | Y (ESRD at 18)                       | Y        | NA  | N                   | N                                                                  | 2                      | X                                       | COL4A5           | c.[4821+1G>A]                                  |                                                            | Hanson et al. 2011                         |
| 4               | M   | 26          | Y (NA)                     | Y (ESRD at 25)                       | N        | N   | NA                  | Skin : normal                                                      | 1                      | X or AR                                 | COL4A4           | c.[1354G>A];[1351G>A]                          | p.[Gly451Ser];[Gly451Ser]                                  | this study                                 |
| 5               | F   | 26          | Y (26)                     | N                                    | Y        | Y   | N                   | N                                                                  | 3                      | X or AR                                 | COL4A3           | c.[1354G>A];[1354G>A]                          | p.[Gly452Arg];[Gly452Arg]                                  | this study                                 |
| 6               | F   | 15          | N (15)                     | N                                    | N        | NA  | N                   | N                                                                  | 1                      | X or AD                                 | COL4A3           | c.[1855G>A];[=]                                | p.[Gly619Arg];[=]                                          | this study                                 |
| 7               | F   | 28          | Y (28)                     | N                                    | N        | N   | N                   | GBM: discontinuous<br>Skin : normal                                | 2                      | X or AD                                 | COL4A3           | c. [2065G>A(;);2737G>A]                        | p.[Gly689Arg(;);Gly913Arg]                                 | this study and this study                  |
| 8               | F   | 17          | Y (17)                     | N                                    | Y        | NA  | N                   | GBM : negative<br>Skin : normal                                    | 2                      | AR**                                    | COL4A3           | c.[345delG(;);4708T>C]                         | p.[Pro116LeufsX37(;);Cys1570Arg]                           | this study and this study                  |
| 9               | F   | 8           | Y (8)                      | N                                    | Y        | N   | NA                  | N                                                                  | 2                      | AR                                      | COL4A3           | c.[4441C>T];[c.2621_2622delinsT □]             | p. [Arg1481*];[Gly874Valfs*9□]                             | Lemminck et al. 1994 and Heidet et al 2001 |
| 10              | F   | 63          | N (63)                     | N                                    | N        | N   | N                   | N                                                                  | 1 (BFH)                | BFH                                     | COL4A3           | c. [3674G>T];[=]                               | p. [Gly1225Val];[=]                                        | this study                                 |
| 11              | F   | 28          | Y (28)                     | Y                                    | N        | N   | Y thick and thin    | GBM : weak and irregular. Skin : normal                            | 2                      | AR or AD                                | COL4A3           | c.[2020+2T>C];[=]                              |                                                            | this study                                 |
| 12              | M   | 10          | N (9)                      | N                                    | N        | NA  | NA                  | N                                                                  | 1 (BFH)                | BFH                                     | COL4A4           | c.[2320G>C];[=]                                | p.[Gly774Arg];[=]                                          | Slajpah et al. 2007                        |
| 13              | F   | 32          | Y (NA)                     | Y (ESRD at 21)                       | N        | NA  | Y thick and thin    | N                                                                  | 2                      | X or AD                                 | COL4A5           | c.[2264T>G];[=]                                | p.[Leu755*];[=]                                            | this study                                 |
| 14 <sup>1</sup> | M   | 50          | Y (50)                     | Y                                    | Y        | Y   | N                   | Skin : normal                                                      | 3                      | X or AD                                 | COL4A4<br>COL4A3 | c.[4698delT];[=]<br>c.[1558G>C];[=]            | p.[Cys1566Trpfs*37];[=]<br>p.[Gly520Arg];[=]               | this study<br>this study                   |
| 15              | M   | 25          | Y (NA)                     | Y (ESRD at 20)                       | Y        | N   | Y thick and thin    | Skin : normal                                                      | 3                      | AR                                      | COL4A3           | c.[1504+1G>A];[1504+1G>A]                      |                                                            | this study                                 |
| 16              | F   | 27          | Y (NA)                     | Y (ESRD at 25)                       | Y        | NA  | Y thick and thin    | NA                                                                 | 2                      | AR                                      | -                | -                                              | -                                                          | -                                          |
| 17              | F   | 28          | Y (28)                     | N                                    | N        | N   | N                   | GBM: discontinuous                                                 | 2                      | X or AD                                 | COL4A3           | c.[145G>C];[=]                                 | p.[Gly49Arg];[=]                                           | this study                                 |
| 18              | F   | 35          | Y (35)                     | Y                                    | Y        | NA  | N                   | N                                                                  | 2                      | X or AD                                 | COL4A3           | c.[1363G>T];[=]                                | p.[Gly455Cys];[=]                                          | this study                                 |
| 19              | M   | 27          | NA                         | Y (ESRD at 15)                       | Y        | NA  | NA                  | N                                                                  | 1                      | X or AR                                 | COL4A5           | c.[5051G>A]                                    | p.[Cys1684Tyr]                                             | this study                                 |
| 20              | F   | 14          | Y (14)                     | N                                    | N        | N   | N                   | Skin : normal                                                      | 1                      | X or AD                                 | COL4A3           | c.[2197G>A(;);988-6C>T‡]                       | p.[Gly733Arg]                                              | this study                                 |
| 21              | F   | 24          | N                          | N                                    | Y        | NA  | Y thick and thin    | GBM : normal<br>Skin : normal                                      | 2                      | X or AR                                 | -                | -                                              | -                                                          | -                                          |
| 22              | F   | 28          | Y (NA)                     | Y (ESRD at 15)                       | NA       | NA  | Y irregularly thick | GBM : negative<br>Skin normal                                      | 2                      | AR**                                    | COL4A3           | c.[3454G>C];[4743T>G]                          | p.[Gly1152Arg];[Phe1581Leu]                                | this study and this study                  |
| 23              | M   | 53          | NA                         | Y                                    | NA       | NA  | N                   | NI                                                                 | 1                      | AD**                                    | -                | -                                              | -                                                          | -                                          |
| 24              | M   | 43          | Y (43)                     | Y                                    | Y        | NA  | NA                  | N                                                                  | 2                      | AD**                                    | COL4A4           | c.[1-?_192+?del];[=]                           |                                                            | this study                                 |
| 25              | F   | 31          | Y (31)                     | Y                                    | Y        | Y   | Y thick and thin    | GBM : negative<br>Skin normal                                      | 4                      | AR**                                    | COL4A3           | c.[3566-2A>T];[4364delC]                       | p.[Thr1455Lysfs*74]                                        | Heidet et al and this study                |
| 26              | M   | 24          | Y (23)                     | N                                    | Y        | N   | Y thick and thin    | GBM : negative                                                     | 2                      | AR                                      | COL4A4           | c.[1118G>A (;);4129C>T]                        | p.[Gly373Glu(;);Arg1377*]                                  | this study and Boye et al. 1998            |
| 27              | F   | 22          | Y (2)                      | N                                    | N        | N   | Y irregularly thick | Skin : normal                                                      | 1                      | X or AR                                 | COL4A5           | c.[4316-2A>G];[=]                              |                                                            | this study                                 |
| 28              | F   | 48          | N (48)                     | NA                                   | N        | NA  | NA                  | N                                                                  | 1 (BFH)                | BFH                                     | COL4A4           | c. [313delG];[=]                               | p. [Asp105Thrfs*16];[=]                                    | this study                                 |
| 29              | M   | 20          | NA                         | Y (ESRD at 16)                       | Y        | Y   | Y irregularly thick | Skin : normal                                                      | 4                      | X or AR                                 | COL4A4           | c.[313delG]; [313delG]                         | p.[Asp105Thrfs*16]; [Asp105Thrfs*16]                       | this study                                 |
| 30              | M   | 45          | NA                         | Y (ESRD at 25)                       | Y        | NA  | N                   | N                                                                  | 2                      | AR                                      | COL4A3           | c.[889- ?_1114+ ?del]; [(889- ?_1114+ ?del)]   |                                                            | this study                                 |
| 31              | F   | 35          | N (35)                     | N                                    | N        | N   | NA                  | Skin : normal                                                      | 1 (BFH)                | BFH                                     | COL4A4           | c.[114G>A] ‡;[=]                               | p.[Gly38Gly] ‡;[=]                                         | this study                                 |
| 32              | F   | 48          | Y (48)                     | Y                                    | N        | NA  | Y thin              | GBM : normal                                                       | 1                      | AD                                      | COL4A4           | c.[81_86del6];[=]                              | p.[Iso29_Leu30del];[=]                                     | this study                                 |
| 33              | M   | 42          | Y                          | Y                                    | NA       | NA  | N                   | N                                                                  | 1                      | X or AD                                 | -                | -                                              | -                                                          | -                                          |
| 34              | M   | 61          | NA                         | Y                                    | N        | Y   | Y thick and thin    | N                                                                  | 3                      | AD                                      | COL4A4           | c.[3684delG];[=]                               | p. [Gly1230Valfs*58];[=]                                   | this study                                 |
| 35              | M   | 27          | NA                         | Y (ESRD at 26)                       | Y        | NA  | N                   | Skin : normal                                                      | 1                      | AR                                      | COL4A3           | c. [546+1G>T];[88- ?_4755+ ?dup] †             |                                                            | this study and this study                  |

| Patient #        | Sex | Age (years) | Proteinuria (age in years) | Renal failure (if ESRD, age at ESRD) | Deafness | Eye | Electron Microscopy | Immunofluorescence (with anti-a5(IV) antibodies when not precised) | Modified Flinter Score | Initially suspected mode of inheritance | Affected gene    | Nucleotide change                               | Protein change                           | Reference                         |
|------------------|-----|-------------|----------------------------|--------------------------------------|----------|-----|---------------------|--------------------------------------------------------------------|------------------------|-----------------------------------------|------------------|-------------------------------------------------|------------------------------------------|-----------------------------------|
| 36               | M   | 20          | Y (NA)                     | Y (ESRD at 20)                       | NA       | NA  | NA                  | N                                                                  | 1                      | AR                                      | COL4A4           | c.[508G>A];[4129C>T]                            | p.[Gly170Arg] ;[Arg1377*]                | this study and Boye et al. 1998   |
| 37 <sup>s</sup>  | F   | 26          | N (26)                     | N                                    | N        | N   | N                   | Skin : normal                                                      | 1                      | AD                                      | COL4A3<br>COL4A4 | c.[934G>C];[=]<br>c.[919C>T]‡;[=]               | p.[Gly312Arg];[=]<br>p.[Pro307Ser]‡;[=]  | this study<br>this study          |
| 38               | M   | 6           | Y (2)                      | N                                    | N        | NA  | Y thin              | GBM : negative                                                     | 2                      | X                                       | COL4A5           | c.[1894G>C]                                     | p.[Gly632Arg]                            | this study                        |
| 39               | M   | 30          | NA                         | Y                                    | N        | NA  | NA                  | Skin : negative                                                    | 2                      | X**                                     |                  | -                                               | -                                        | -                                 |
| 40               | F   | 27          | N                          | N                                    | N        | N   | Y thin              | NA                                                                 | 0                      | Sporadic hematuria                      |                  | -                                               | -                                        | -                                 |
| 41               | F   | 27          | Y (NA)                     | Y (ESRD at 15)                       | Y        | NA  | Y thick and thin    | GBM : negative                                                     | 3                      | AR                                      | COL4A3           | c. [4153+2T>A];[1151-?_1504+?del]               |                                          | this study and this study         |
| 42               | M   | 5           | Y (5)                      | N                                    | NA       | N   | NA                  | GBM : negative                                                     | 0                      | AR                                      | COL4A3           | c.[3883- ?_4252+?dup];<br>[3883- ?_4252+?dup] † |                                          | this study                        |
| 43               | M   | 28          | NA                         | NA                                   | Y        | Y   | NA                  | Skin : discontinuous                                               | 2                      | X**                                     | -                | -                                               | -                                        | -                                 |
| 44               | F   | 34          | NA                         | N                                    | Y        | NA  | N                   | NA                                                                 | 1                      | X or AD or AR                           | -                | -                                               | -                                        | -                                 |
| 45 <sup>§§</sup> | M   | 16          | Y (NA)                     | Y (ESRD at 16)                       | ?        | NA  | NA                  | Skin : negative <sup>§§</sup>                                      | 1                      | X**                                     | COL4A4           | c.[2717-2A>G];[2717-2A>G]                       |                                          | this study                        |
| 46               | M   | 42          | NA                         | N                                    | N        | NA  | NA                  | N                                                                  | 3                      | X or AD                                 | COL4A4           | c.[4693C>T];[=]                                 | p.[Arg1565Cys];[=]                       | this study                        |
| 47               | F   | 22          | NA                         | Y (ESRD at 16)                       | ?        | NA  | NA                  | N                                                                  | 1                      | AR                                      | COL4A4           | c.[914_930+30del];[914_930+30del]               |                                          | this study                        |
| 48               | M   | 45          | Y (45)                     | N                                    | N        | N   | N                   | Skin : normal                                                      | 1                      | X or AD                                 | COL4A3           | c.[145G>C];[=]                                  | p.[Gly49Arg];[=]                         | this study                        |
| 49               | F   | 19          | Y (NA)                     | N                                    | N        | N   | Y normal            | N                                                                  | 1 (BFH)                | BFH                                     | -                | -                                               | -                                        | -                                 |
| 50               | M   | 5           | N (4)                      | N                                    | N        | NA  | NA                  | Skin : negative                                                    | 2                      | X**                                     | COL4A5           | c.[1826G>A]                                     | p.[Gly609Asp]                            | this study                        |
| 51               | M   | 18          | Y (11)                     | N                                    | N        | N   | Y thin              | N                                                                  | 1                      | X or AD                                 | COL4A5           | c.[1846_1854del9]                               | p.[Asn616_Gly618del]                     | this study                        |
| 52               | M   | 26          | Y (26)                     | Y                                    | Y        | Y   | N                   | Skin : negative                                                    | 4                      | X**                                     | -                | -                                               | -                                        | -                                 |
| 53               | F   | 10          | Y (10)                     | N                                    | Y        | NA  | Y                   | Skin : normal                                                      | 3                      | AR                                      | COL4A3           | c.[2T>G(;)432_440delinsGATTA]                   | p.[Met1Arg(;)Gly145Ilefs*7]              | this study and this study         |
| 54               | M   | 15          | Y (15)                     | N                                    | Y        | N   | Y thick and thin    | GBM : negative                                                     | 2                      | AR                                      | COL4A3           | c.[2323_2340del; 2375-?_2656+?del]              | p.[Leu775_Gly780del;????del]             | this study                        |
| 55               | M   | 5           | Y (3)                      | N                                    | N        | NA  | NA                  | GBM : negative<br>Skin : negative                                  | 1                      | X**                                     | COL4A5           | c.[2244+1G>T]                                   |                                          | Bekhnireia et al. 2010            |
| 56               | F   | 64          | Y(64)                      | N                                    | N        | NA  | Y thick and thin    | GBM : normal                                                       | 2                      | X or AD                                 | -                | -                                               | -                                        | -                                 |
| 57               | F   | 5           | N (<1)                     | N                                    | N        | NA  | NA                  | N                                                                  | 1 (BFH)                | BFH                                     | COL4A5           | c.[2589_2660del];[=]                            | c.[Ser864_Gly887del]+[=]                 | this study                        |
| 58               | M   | 29          | NA                         | Y (ESRD at 17)                       | N        | N   | NA                  | N                                                                  | 1                      | X                                       | COL4A5           | c.[3685G>T]                                     | p.[Gly1229Cys]                           | this study                        |
| 59               | F   | 4           | Y (4)                      | N                                    | N        | NA  | N                   | GBM : discontinuous                                                | 1                      | X                                       |                  | -                                               | -                                        | -                                 |
| 60               | M   | 9           | NA                         | N                                    | NA       | NA  | NA                  | N                                                                  | 1                      | X                                       | COL4A5           | c.[3898-2A>T]                                   |                                          | Krol et al. 2010                  |
| 61               | M   | 28          | N                          | N                                    | N        | NA  | N                   | N                                                                  | 1 (BFH)                | BFH                                     | COL4A3           | c.[3238G>A];[=]                                 | p.[Gly1080Arg]                           | This study                        |
| 62               | M   | 14          | Y (14)                     | N                                    | Y        | N   | NA                  | Skin : normal                                                      | 2                      | AR                                      | COL4A3           | c.[2768_2778del];<br>[4420_4424del]             | p.[Val923Glufs*13];<br>[Leu1474Cysfs*34] | this study and Lemmink et al.1994 |
| 63               | M   | 33          | Y (NA)                     | Y (ESRD at 15)                       | Y        | Y   | NA                  | Skin : normal                                                      | 2                      | AR                                      | COL4A4           | c.[3817+1G>T];[3817+1G>T]                       |                                          | this study                        |
| 64               | M   | 9           | Y (8)                      | NA                                   | Y        | Y   | Y thick and thin    | GBM : negative<br>Skin : normal                                    | 4                      | AR**                                    | COL4A3           | c.[2065G>A];[2981-76C>T] ‡                      | p.[Gly689Arg]                            | this study and this study         |
| 65               | M   | 10          | NA                         | NA                                   | Y        | N   | NA                  | N                                                                  | 1                      | AR                                      | COL4A3           | c.[345delG(;)3109C>T]                           | p.[Pro116Leufs*37(;)Arg1037*]            | this study and Longo et al. 2002  |
| 66               | M   | 4           | Y (2)                      | N                                    | N        | N   | Y thick and thin    | GBM : negative                                                     | 2                      | X                                       | COL4A5           | c.[1-?_141+?del]*                               |                                          | this study                        |
| 67 <sup>  </sup> | F   | 44          | NA                         | N                                    | Y        | NA  | Y thick and thin    | N<br>N                                                             | 3                      | X or AD                                 | COL4A4<br>COL4A5 | c.[2075G>T];[=]<br>c.[1931G>A];[=]              | p.[Gly692Val];[=]<br>p.[Gly644Asp]       | this study<br>this study          |
| 68               | M   | 24          | Y (24)                     | NA                                   | Y        | NA  | N                   | GBM : negative<br>Skin : normal                                    | 3                      | AR**                                    | COL4A3           | c.[3883- ?_4252+?dup];<br>[3883- ?_4252+?dup] † |                                          | this study                        |
| 69               | M   | 29          | N (29)                     | N                                    | N        | NA  | N                   | N                                                                  | 1 (BFH)                | BFH                                     | -                | -                                               | -                                        | -                                 |
| 70               | M   | 27          | NA                         | N                                    | N        | NA  | N                   | N                                                                  | 1                      | AD                                      | COL4A3           | c.[346C>A] ‡;[=]                                | p.[Pro116Thr];[=]                        | this study                        |
| 71               | F   | 3           | N (3)                      | N                                    | N        | N   | N                   | N                                                                  | 1 (BFH)                | BFH                                     | -                | -                                               | -                                        | -                                 |

| Patient # | Sex | Age (years) | Proteinuria (age in years) | Renal failure (if ESRD, age at ESRD) | Deafness | Eye | Electron Microscopy | Immunofluorescence (with anti-a5(IV) antibodies when not precised) | Modified Flinter Score | Initially suspected mode of inheritance | Affected gene | Nucleotide change        | Protein change                       | Reference                       |
|-----------|-----|-------------|----------------------------|--------------------------------------|----------|-----|---------------------|--------------------------------------------------------------------|------------------------|-----------------------------------------|---------------|--------------------------|--------------------------------------|---------------------------------|
| 72        | M   | 38          | Y (30)                     | N                                    | Y        | N   | NA                  | Skin : normal                                                      | 2                      | X or AD                                 | COL4A5        | c.[2765_2766delinsTT]    | p.[Lys922Ile]                        | this study                      |
| 73        | F   | 3           | Y (1)                      | N                                    | N        | N   | NA                  | Skin : discontinuous                                               | 1                      | X**                                     | COL4A5        | c.[321_321+1dup];[=]     | p. Gly108Trpfs*48                    | this study                      |
| 74        | M   | 33          | NA                         | Y (ESRD at 21)                       | Y        | N   | N                   | N                                                                  | 2                      | X                                       | -             | -                        | -                                    | -                               |
| 75        | M   | 33          | Y (NA)                     | Y                                    | N        | N   | NA                  | Skin : negative                                                    | 2                      | X**                                     | COL4A5        | c.[4352G>A]              | p.[Gly1451Asp]                       | this study                      |
| 76        | M   | 11          | Y (4)                      | N                                    | Y        | NA  | NA                  | Skin : weak                                                        | 2                      | X                                       | COL4A5        | c.[1913G>A]              | p.[Gly638Asp]                        | this study                      |
| 77        | M   | 13          | N (13)                     | N                                    | N        | Y   | N                   | Skin : normal                                                      | 2                      | AD                                      | COL4A3        | c.[2083G>A];[=]          | p.[Gly695Arg];[=]                    | Wang et al. 2004                |
| 78        | F   | 41          | N (41)                     | N                                    | N        | N   | N                   | GBM : normal                                                       | 1 (BFH)                | BFH                                     | COL4A3        | c.[172G>A];[=]           | p.[Gly58Ser];[=]                     | this study                      |
| 79        | M   | 41          | Y (NA)                     | Y (ESRD at 34)                       | Y        | NA  | NA                  | Skin : negative                                                    | 3                      | X**                                     | COL4A5        | c.[2918G>A]              | p.[Gly973Asp]                        | this study                      |
| 80        | M   | 12          | N (7)                      | N                                    | N        | N   | N                   | N                                                                  | 1                      | X or AR                                 | -             | -                        | -                                    | -                               |
| 81        | F   | 29          | NA                         | NA                                   | Y        | N   | N                   | N                                                                  | 2                      | X                                       | -             | -                        | -                                    | -                               |
| 82        | M   | 39          | Y (NA)                     | Y (ESRD at 21)                       | Y        | N   | NA                  | Skin : normal                                                      | 2                      | X or AR                                 | COL4A5        | c.[646-12_-11delTT]      | p.[Gly216_Lys229]                    | Tazon Vega et al. 2007          |
| 83        | M   | 27          | NA                         | Y (ESRD at 25)                       | Y        | NA  | NA                  | Skin : negative                                                    | 3                      | X**                                     | COL4A5        | c.[3154C>T]              | p.[Gln1052*]                         | this study                      |
| 84        | M   | 61          | Y (NA)                     | Y                                    | Y        | NA  | N                   | Skin : discontinuous                                               | 2                      | X**                                     | COL4A5        | c.[82-?_1516+?]          | -                                    | this study                      |
| 85        | F   | 34          | NA                         | Y (ESRD at 17)                       | N        | N   | N                   | N                                                                  | 1                      | X                                       | COL4A5        | c.[3925-?_4198+?del];[=] | -                                    | this study                      |
| 86        | F   | 30          | Y (30)                     | N                                    | N        | NA  | N                   | GBM : normal                                                       | 1                      | AD or AR                                | COL4A3        | c.[2083G>A];[4502C>A]    | p.[Gly695Arg];[Pro1501Gln]           | Wang et al. 2004 and this study |
| 87        | F   | 28          | Y(27)                      | N                                    | N        | N   | Y thin              | Skin : normal                                                      | 1                      | X or AD or AR                           | -             | c.[2322delT]□;[=]        | p.[Leu775Phe*fs]□;[=]                | this study                      |
| 88        | M   | 16          | Y (16)                     | N                                    | Y        | N   | Y thick and thin    | N                                                                  | 3                      | X                                       | COL4A5        | c.[3071G>A]              | p.[Gly1024Glu]                       | this study                      |
| 89        | M   | 25          | Y (22)                     | Y                                    | Y        | NA  | N                   | GBM : normal                                                       | 2                      | X                                       | COL4A5        | c.[947G>A]               | p.[Gly316Asp]                        | this study                      |
| 90        | F   | 54          | Y (32)                     | N                                    | N        | N   | N                   | N                                                                  | 1                      | X or AD                                 | COL4A5        | c.[1871G>A];[=]          | p.[Gly624Asp];[=]                    | Deltas et al. 2012              |
| 91        | M   | 33          | Y (NA)                     | Y (ESRD at 16)                       | Y        | NA  | Y thick             | N                                                                  | 2                      | X or AR                                 | COL4A5        | c.[2918-1G>A]            | -                                    | this study                      |
| 92        | F   | 8           | Y (6)                      | N                                    | N        | N   | Y thick and thin    | N                                                                  | 1                      | X or AD or AR                           | COL4A5        | c.[1808G>T];[=]          | p.[Gly603Val];[=]                    | Barker et al. 2001              |
| 93        | M   | 8           | Y (8)                      | N                                    | Y        | N   | N                   | N                                                                  | 2                      | AR                                      | COL4A3        | c.[805G>T];[805G>T]      | p.[Glu269*];[(Glu269*)]              | this study                      |
| 94        | F   | 45          | NA                         | Y                                    | Y        | Y   | NA                  | N                                                                  | 3                      | X or AD                                 | COL4A4        | c.[1460G>T];[=]          | p.[Gly487Val];[=]                    | this study                      |
| 95        | M   | 5           | Y (1)                      | N                                    | N        | NA  | N                   | N                                                                  | 1                      | X                                       | COL4A5        | c.[4054C>A] ‡            | p.[Leu1352Ile]                       | this study                      |
| 96        | M   | 21          | NA                         | Y (ESRD at ?)                        | Y        | NA  | N                   | N                                                                  | 2                      | X                                       | COL4A5        | c.[3899delG]             | p.[Gly1300Glufs*20]                  | this study                      |
| 97        | F   | 20          | Y (20)                     | N                                    | N        | NA  | N                   | GBM : discontinuous                                                | 1                      | AD                                      | COL4A3        | c.[3115G>C];[=]          | p.[Gly1039Arg];[=]                   | this study                      |
| 98        | M   | 45          | Y (12)                     | Y                                    | Y        | NA  | N                   | N                                                                  | 2                      | X                                       | COL4A5        | c.[3754G>A]              | p.[Gly1252Ser]                       | Knebelmann et al. 1996          |
| 99        | M   | 27          | Y (NA)                     | Y (ESRD at 26)                       | Y        | NA  | NA                  | Skin : normal                                                      | 2                      | AR                                      | COL4A4        | c.[81_86del];[4646delT]  | p.[Iso29_Leu30del]; [Leu1549Profs*3] | this study and this study       |
| 100       | M   | 16          | NA                         | Y (ESRD at 16)                       | Y        | Y   | N                   | Skin : negative                                                    | 3                      | X**                                     | COL4A5        | c.[5029C>T]              | p.[Arg1677*];[=]                     | Plant et al. 1999               |
| 101       | F   | 21          | NA                         | Y (ESRD at 21)                       | Y        | N   | NA                  | N                                                                  | 2                      | AR                                      | COL4A4        | c.[694-2A>T]; [694-2A>T] | -                                    | this study                      |

‡ : variants of unknown significance. The c.[114G>A] variation may have some effect on splicing.

t: this patient carries the c.[1558G>C];[=] p.[Gly520Arg];[=] variant in COL4A3 and the c.[4698delT]+[=] p.Cys1566Trpfs\*37 variant on the COL4A4 gene

§ : this patient carries the variant c.[934G>C];[=] p.[Gly312Arg];[=] in the COL4A3 gene and the variant c.[919C>T]+[=] p.[Pro307Ser]+[=] in the COL4A4 gene

¶: this patient carries the c.[2075G>T];[=] p. [Gly692Val];[=] in the COL4A4 gene and the c.[1931G>A];[=] p.[Gly644Asp] in the COL4A5 gene

§§ : important melanic pigmentation in patient #45 led to a mis-interpretation of the anti-a5(IV) labelling of the skin BM

† : location of the duplications has not been checked

Y : yes ; N : no ; NA : information not available

BFH : phenotype of benign familial hematuria

X : X-linked; AR : autosomal recessive; AD : autosomal dominant

\*: that deletion was extending in COL4A6

□ : mutations identified by Sanger sequencing

\*\* : cases in which the mode of inheritance could be assessed with certainty

Supplementary Table 2 : mean coverage of each of the 150 coding exons across the 33 patients tested during the last two runs. Minimal coverage is shown in brackets. \* : these two exons are deleted in this individual.

| COL4A3<br>Exon number | Ex 1     | 0(0)      | 262(124)  | 1(1)       | 2(1)     | 0(0)      | 0(0)      | 0(0)     | 0(0)      | 0(0)     | 247(125)   | 2(1)      | 0(0)      | 0(0)      | 4(1)       | 0(0)      | 309(153) | 267(121) | 105(56)  | 25(12)    | 27(21)    | 0(0)     | 10(6)    | 124(59)   | 333(173)  | 444(216) | 551(280)  | 568(277)   | 0(0)     | 426(231)  | 588(286)   | 67(32)     |          |
|-----------------------|----------|-----------|-----------|------------|----------|-----------|-----------|----------|-----------|----------|------------|-----------|-----------|-----------|------------|-----------|----------|----------|----------|-----------|-----------|----------|----------|-----------|-----------|----------|-----------|------------|----------|-----------|------------|------------|----------|
| Ex 2                  | 290(177) | 434(237)  | 289(165)  | 462(245)   | 326(189) | 339(193)  | 408(252)  | 252(167) | 365(222)  | 389(250) | 519(322)   | 376(216)  | 316(180)  | 406(231)  | 666(402)   | 175(103)  | 287(155) | 383(239) | 241(135) | 398(234)  | 279(237)  | 219(137) | 294(176) | 380(242)  | 319(185)  | 274(154) | 394(253)  | 896(560)   | 254(159) | 334(188)  | 604(368)   | 498(290)   | 254(140) |
| Ex 3                  | 325(240) | 426(327)  | 465(357)  | 538(397)   | 360(280) | 473(360)  | 564(445)  | 460(360) | 438(330)  | 404(299) | 557(389)   | 429(319)  | 484(362)  | 565(410)  | 759(561)   | 469(358)  | 442(316) | 423(314) | 236(169) | 408(296)  | 444(330)  | 373(271) | 289(215) | 439(323)  | 318(231)  | 351(238) | 478(349)  | 715(517)   | 350(270) | 371(286)  | 636(444)   | 522(371)   | 314(223) |
| Ex 4                  | 198(94)  | 340(179)  | 164(71)   | 262(124)   | 219(108) | 218(125)  | 287(138)  | 223(129) | 232(126)  | 232(101) | 329(157)   | 224(115)  | 183(98)   | 222(103)  | 412(208)   | 132(73)   | 192(85)  | 232(109) | 138(71)  | 215(100)  | 249(118)  | 146(65)  | 170(75)  | 201(87)   | 189(95)   | 181(90)  | 255(133)  | 176(74)    | 190(77)  | 191(100)  | 409(209)   | 360(144)   | 149(70)  |
| Ex 5                  | 366(264) | 475(274)  | 428(335)  | 535(415)   | 390(310) | 430(262)  | 463(262)  | 367(200) | 433(245)  | 368(262) | 562(400)   | 426(312)  | 364(229)  | 485(306)  | 748(480)   | 225(144)  | 374(236) | 390(250) | 251(171) | 430(281)  | 478(361)  | 368(272) | 316(235) | 434(313)  | 398(291)  | 336(261) | 460(367)  | 849(677)   | 326(251) | 413(260)  | 750(573)   | 565(400)   | 323(247) |
| Ex 6                  | 714(432) | 1242(887) | 909(591)  | 1178(798)  | 849(518) | 1018(665) | 1134(792) | 961(664) | 1036(729) | 873(577) | 1365(859)  | 1011(648) | 1096(729) | 1137(764) | 1807(1203) | 1046(711) | 946(611) | 990(665) | 627(420) | 1025(674) | 1023(655) | 757(498) | 781(517) | 828(502)  | 901(432)  | 943(604) | 1333(865) | 1830(1173) | 882(562) | 837(537)  | 1421(912)  | 1200(769)  | 807(519) |
| Ex 7                  | 188(99)  | 304(169)  | 196(102)  | 315(189)   | 213(136) | 203(115)  | 237(151)  | 230(137) | 259(134)  | 292(174) | 188(101)   | 236(125)  | 192(100)  | 273(146)  | 438(248)   | 184(102)  | 209(126) | 146(79)  | 105(44)  | 284(160)  | 208(123)  | 163(101) | 160(88)  | 252(136)  | 189(110)  | 190(105) | 211(117)  | 440(231)   | 169(104) | 226(115)  | 385(212)   | 357(191)   | 164(99)  |
| Ex 8                  | 298(218) | 432(301)  | 356(252)  | 526(374)   | 359(281) | 404(279)  | 469(347)  | 372(269) | 389(263)  | 428(315) | 394(277)   | 418(311)  | 342(255)  | 443(320)  | 723(508)   | 100(85)   | 359(261) | 327(234) | 181(124) | 407(290)  | 361(254)  | 242(163) | 266(194) | 384(264)  | 299(218)  | 314(219) | 417(304)  | 772(542)   | 203(154) | 351(240)  | 671(441)   | 554(400)   | 270(201) |
| Ex 9                  | 361(243) | 524(388)  | 402(286)  | 583(409)   | 355(250) | 411(316)  | 514(392)  | 433(326) | 418(325)  | 438(302) | 640(437)   | 443(306)  | 397(293)  | 598(439)  | 809(589)   | 318(247)  | 467(354) | 426(308) | 252(170) | 471(343)  | 417(300)  | 297(204) | 291(228) | 451(307)  | 367(257)  | 352(238) | 450(321)  | 886(605)   | 297(208) | 389(252)  | 770(535)   | 610(418)   | 365(249) |
| Ex 10                 | 448(307) | 531(316)  | 501(345)  | 676(484)   | 481(346) | 515(309)  | 591(340)  | 477(277) | 481(279)  | 437(249) | 740(487)   | 605(387)  | 545(342)  | 603(387)  | 966(571)   | 319(205)  | 530(336) | 432(253) | 287(179) | 477(277)  | 485(326)  | 360(246) | 324(209) | 422(289)  | 472(311)  | 430(286) | 577(347)  | 635(362)   | 427(295) | 498(301)  | 739(481)   | 780(555)   | 388(239) |
| Ex 11                 | 602(377) | 748(475)  | 539(319)  | 794(503)   | 552(344) | 630(407)  | 751(496)  | 564(353) | 572(345)  | 568(359) | 733(443)   | 666(426)  | 573(369)  | 674(433)  | 1090(685)  | 249(150)  | 591(389) | 609(410) | 328(223) | 649(447)  | 659(420)  | 468(316) | 461(298) | 538(345)  | 535(347)  | 492(329) | 754(512)  | 1126(769)  | 427(292) | 589(382)  | 1028(680)  | 892(583)   | 415(246) |
| Ex 12                 | 502(318) | 748(607)  | 576(410)  | 751(499)   | 615(425) | 576(450)  | 646(509)  | 506(421) | 593(455)  | 590(417) | 652(436)   | 577(403)  | 495(338)  | 667(489)  | 975(718)   | 347(260)  | 555(417) | 581(413) | 344(249) | 623(466)  | 632(434)  | 528(346) | 443(286) | 564(379)  | 529(367)  | 583(403) | 747(512)  | 1143(769)  | 449(263) | 549(373)  | 1001(659)  | 839(547)   | 499(312) |
| Ex 13                 | 488(166) | 305(234)  | 271(200)  | 368(269)   | 245(182) | 269(208)  | 308(238)  | 226(174) | 288(242)  | 280(214) | 402(295)   | 276(213)  | 191(154)  | 311(278)  | 462(354)   | 134(110)  | 256(209) | 269(219) | 145(129) | 256(217)  | 354(267)  | 199(163) | 194(128) | 300(217)  | 223(157)  | 212(157) | 310(250)  | 597(458)   | 196(156) | 219(192)  | 535(425)   | 414(315)   | 199(149) |
| Ex 14                 | 298(372) | 696(577)  | 511(353)  | 811(606)   | 577(425) | 564(467)  | 695(569)  | 471(384) | 565(448)  | 586(463) | 826(637)   | 633(480)  | 487(378)  | 710(573)  | 952(799)   | 194(141)  | 541(429) | 605(485) | 334(266) | 610(467)  | 694(496)  | 424(322) | 449(340) | 679(506)  | 449(341)  | 437(331) | 665(497)  | 1157(911)  | 356(263) | 534(399)  | 1031(770)  | 664(453)   | 331(231) |
| Ex 15                 | 347(227) | 529(360)  | 402(283)  | 544(401)   | 413(280) | 463(325)  | 533(407)  | 349(257) | 444(313)  | 432(312) | 554(365)   | 441(306)  | 412(285)  | 586(410)  | 808(560)   | 215(148)  | 468(324) | 450(325) | 235(164) | 458(330)  | 421(296)  | 296(207) | 273(193) | 409(274)  | 314(211)  | 324(219) | 456(348)  | 780(552)   | 246(154) | 451(323)  | 772(531)   | 544(361)   | 324(230) |
| Ex 16                 | 392(314) | 425(371)  | 387(270)  | 563(411)   | 401(298) | 398(298)  | 424(329)  | 357(271) | 423(372)  | 394(291) | 623(505)   | 417(342)  | 423(337)  | 467(353)  | 631(493)   | 262(192)  | 382(296) | 374(277) | 212(162) | 416(291)  | 461(374)  | 368(306) | 314(230) | 507(404)  | 410(330)  | 395(302) | 533(411)  | 389(296)   | 318(234) | 401(319)  | 767(617)   | 538(412)   | 374(293) |
| Ex 17                 | 602(461) | 723(582)  | 657(509)  | 827(643)   | 653(541) | 721(619)  | 915(810)  | 699(605) | 758(666)  | 707(591) | 866(742)   | 756(618)  | 562(477)  | 900(753)  | 1346(1120) | 261(210)  | 653(560) | 643(541) | 381(324) | 726(608)  | 876(702)  | 497(388) | 518(413) | 666(533)  | 538(447)  | 588(467) | 916(772)  | 1408(1131) | 389(300) | 655(525)  | 1176(964)  | 996(825)   | 489(397) |
| Ex 18                 | 633(516) | 913(799)  | 725(637)  | 1148(982)  | 757(655) | 929(785)  | 950(801)  | 758(640) | 868(747)  | 643(545) | 1238(1095) | 837(732)  | 806(704)  | 970(838)  | 1435(1230) | 296(238)  | 696(606) | 666(577) | 428(380) | 844(707)  | 815(729)  | 666(580) | 497(432) | 901(774)  | 672(598)  | 642(562) | 1014(869) | 1297(1129) | 566(500) | 723(612)  | 1408(1279) | 892(786)   | 579(498) |
| Ex 19                 | 576(375) | 691(445)  | 569(386)  | 792(493)   | 531(329) | 661(459)  | 930(513)  | 583(414) | 630(432)  | 546(375) | 906(572)   | 640(397)  | 520(358)  | 734(481)  | 1065(661)  | 397(262)  | 573(370) | 581(363) | 347(205) | 585(347)  | 666(415)  | 426(251) | 439(285) | 666(398)  | 470(278)  | 480(290) | 727(459)  | 576(357)   | 331(218) | 634(440)  | 1031(563)  | 870(504)   | 409(237) |
| Ex 20                 | 334(314) | 634(611)  | 361(351)  | 444(428)   | 351(341) | 514(497)  | 563(541)  | 383(359) | 491(476)  | 390(381) | 567(549)   | 386(375)  | 337(330)  | 487(475)  | 734(718)   | 130(125)  | 362(349) | 431(412) | 262(253) | 513(493)  | 417(398)  | 257(247) | 318(304) | 415(403)  | 375(362)  | 342(328) | 473(453)  | 840(809)   | 272(264) | 466(456)  | 734(708)   | 574(554)   | 267(259) |
| Ex 21                 | 495(251) | 665(329)  | 663(314)  | 815(389)   | 584(277) | 706(337)  | 748(364)  | 634(293) | 634(294)  | 573(270) | 1057(533)  | 718(331)  | 612(306)  | 877(431)  | 1216(576)  | 547(285)  | 633(327) | 618(304) | 344(175) | 619(313)  | 655(349)  | 450(222) | 440(208) | 687(317)  | 514(262)  | 517(264) | 771(404)  | 763(377)   | 365(172) | 635(283)  | 1012(518)  | 867(443)   | 461(230) |
| Ex 22                 | 321(232) | 388(292)  | 315(203)  | 484(300)   | 341(222) | 311(229)  | 415(314)  | 305(191) | 360(265)  | 318(231) | 554(406)   | 393(252)  | 289(192)  | 380(267)  | 608(436)   | 77(39)    | 308(224) | 328(228) | 236(163) | 373(250)  | 407(269)  | 293(174) | 212(143) | 418(271)  | 302(224)  | 275(197) | 456(270)  | 279(181)   | 273(192) | 319(244)  | 657(456)   | 610(441)   | 275(195) |
| Ex 23                 | 264(135) | 406(253)  | 268(140)  | 402(240)   | 299(164) | 275(170)  | 398(253)  | 240(150) | 324(183)  | 363(213) | 314(182)   | 312(164)  | 232(158)  | 371(208)  | 553(325)   | 149(80)   | 317(194) | 326(195) | 165(103) | 373(222)  | 338(151)  | 229(120) | 221(132) | 297(174)  | 276(150)  | 216(133) | 375(199)  | 596(308)   | 183(103) | 292(156)  | 614(351)   | 575(326)   | 211(132) |
| Ex 24                 | 338(236) | 436(317)  | 283(173)  | 408(278)   | 312(210) | 319(218)  | 357(239)  | 224(153) | 306(218)  | 294(200) | 511(344)   | 332(222)  | 343(155)  | 484(337)  | 145(100)   | 310(191)  | 364(238) | 237(177) | 347(239) | 344(211)  | 227(144)  | 261(166) | 350(224) | 236(144)  | 288(208)  | 381(279) | 696(454)  | 168(102)   | 331(218) | 649(386)  | 459(315)   | 262(163)   |          |
| Ex 25                 | 366(265) | 531(445)  | 314(221)  | 461(352)   | 384(293) | 341(267)  | 445(338)  | 343(247) | 406(297)  | 336(268) | 611(501)   | 378(288)  | 441(338)  | 518(414)  | 659(544)   | 476(381)  | 389(312) | 332(280) | 226(169) | 394(296)  | 424(323)  | 335(264) | 299(196) | 420(312)  | 378(270)  | 344(245) | 476(350)  | 339(259)   | 367(274) | 326(244)  | 600(390)   | 398(303)   | 364(263) |
| Ex 26                 | 522(352) | 694(408)  | 653(391)  | 875(526)   | 582(369) | 762(453)  | 886(494)  | 683(401) | 742(484)  | 580(345) | 1181(732)  | 797(469)  | 625(356)  | 1066(663) | 1186(732)  | 726(425)  | 642(427) | 629(392) | 366(240) | 590(336)  | 756(444)  | 477(270) | 478(310) | 650(392)  | 586(353)  | 559(355) | 928(557)  | 1284(789)  | 393(242) | 580(342)  | 1025(686)  | 896(564)   | 463(278) |
| Ex 27                 | 254(203) | 284(242)  | 253(212)  | 335(263)   | 257(201) | 226(184)  | 255(203)  | 191(156) | 271(218)  | 312(248) | 241(204)   | 247(208)  | 236(194)  | 372(307)  | 437(365)   | 276(231)  | 225(188) | 252(217) | 145(123) | 274(214)  | 287(222)  | 212(176) | 183(143) | 248(209)  | 194(160)  | 213(178) | 306(242)  | 539(453)   | 142(116) | 246(206)  | 551(460)   | 472(406)   | 188(157) |
| Ex 28                 | 934(640) | 1094(812) | 1066(719) | 1639(1136) | 902(612) | 1073(773) | 1270(957) | 945(725) | 1082(819) | 936(634) | 1432(1016) | 1184(826) | 857(602)  | 1276(941) | 1921(1398) | 476(337)  | 959(690) | 827(588) | 553(368) | 1033(750) | 1201(834) | 818(569) | 830(545) | 1164(784) | 1014(695) | 900(623) | 1341(908) | 2104(1452) | 723(478) | 1018(732) | 1729(1184) | 1652(1118) | 756(524) |
| Ex 29                 | 179(77)  | 274(157)  | 205(84)   | 292(138)   | 182(85)  | 230(125)  | 251(140)  | 188(120) | 216(132)  | 178(97)  | 340(174)   | 287(145)  | 175(81)   | 220(120)  | 484(286)   | 79(40)    | 261(118) | 221(111) | 142(73)  | 190(90)   | 226(98)   | 159(75)  | 133(56)  | 198(99)   | 165(74)   | 168(78)  | 297(123)  | 449(194)   | 161(74)  | 215(109)  | 388(180)   | 355(156)   | 164(73)  |
| Ex 30                 | 468(330) | 658(473)  | 555(386)  | 712(529)   | 495(371) | 570(384)  | 674(442)  | 547(379) | 589(438)  | 548(394) | 777(555)   | 602(434)  | 599(450)  | 728(522)  | 1052(673)  | 336(230)  | 573(369) | 543(387) | 365(244) | 598(409)  | 638(469)  | 510(384) | 476(338) | 613(434)  | 540(392)  | 575(427) | 710(511)  | 1094(673)  | 466(321) | 503(363)  | 964(674)   | 806(569)</ |          |

COL4A4  
Exon number

|       |          |           |          |           |          |          |          |          |           |          |           |          |          |           |            |          |          |          |          |           |          |          |          |          |          |          |            |            |          |           |            |           |          |
|-------|----------|-----------|----------|-----------|----------|----------|----------|----------|-----------|----------|-----------|----------|----------|-----------|------------|----------|----------|----------|----------|-----------|----------|----------|----------|----------|----------|----------|------------|------------|----------|-----------|------------|-----------|----------|
| Ex 2  | 568(418) | 756(527)  | 733(542) | 1001(735) | 642(480) | 753(517) | 861(586) | 711(510) | 736(541)  | 666(467) | 980(711)  | 794(549) | 690(483) | 818(570)  | 1232(910)  | 464(312) | 720(534) | 666(476) | 450(327) | 700(515)  | 740(572) | 547(404) | 535(390) | 783(557) | 645(462) | 584(421) | 948(660)   | 727(534)   | 546(401) | 620(391)  | 1131(797)  | 930(682)  | 529(403) |
| Ex 3  | 558(421) | 668(575)  | 657(495) | 1008(735) | 587(434) | 682(573) | 737(614) | 537(440) | 639(552)  | 584(456) | 973(830)  | 722(567) | 452(379) | 750(612)  | 1012(835)  | 157(120) | 551(470) | 558(477) | 319(271) | 585(500)  | 714(551) | 493(370) | 394(316) | 793(594) | 675(375) | 501(414) | 665(538)   | 1228(1004) | 336(275) | 599(413)  | 1183(1003) | 843(716)  | 411(323) |
| Ex 4  | 598(444) | 759(622)  | 649(493) | 948(707)  | 620(480) | 666(561) | 639(569) | 744(631) | 681(546)  | 722(565) | 668(567)  | 562(448) | 787(644) | 1030(848) | 337(279)   | 579(482) | 506(396) | 218(263) | 732(598) | 740(549)  | 586(405) | 524(395) | 777(611) | 617(458) | 610(484) | 772(548) | 1273(1006) | 466(370)   | 597(495) | 1179(907) | 816(648)   | 517(364)  |          |
| Ex 5  | 15(11)   | 19(9)     | 30(17)   | 44(13)    | 11(5)    | 29(16)   | 40(23)   | 25(12)   | 24(6)     | 10(4)    | 70(39)    | 31(12)   | 35(13)   | 17(7)     | 56(25)     | 35(15)   | 24(13)   | 14(6)    | 15(6)    | 15(3)     | 30(19)   | 21(11)   | 11(5)    | 28(16)   | 26(14)   | 19(8)    | 30(19)     | 49(26)     | 44(16)   | 20(11)    | 51(27)     | 35(15)    | 20(5)    |
| Ex 6  | 411(186) | 538(311)  | 394(204) | 592(315)  | 405(229) | 423(249) | 538(315) | 366(219) | 430(238)  | 443(231) | 419(209)  | 386(209) | 312(187) | 451(257)  | 814(456)   | 174(100) | 430(217) | 406(210) | 229(134) | 448(268)  | 444(238) | 301(151) | 284(137) | 411(209) | 310(152) | 360(184) | 479(245)   | 848(418)   | 279(136) | 414(216)  | 796(416)   | 554(274)  | 331(174) |
| Ex 7  | 522(387) | 863(661)  | 745(552) | 992(747)  | 705(524) | 772(570) | 857(585) | 776(527) | 719(533)  | 613(414) | 1012(689) | 746(531) | 939(691) | 965(683)  | 1432(1049) | 633(469) | 809(596) | 773(545) | 463(345) | 753(510)  | 781(564) | 719(498) | 579(383) | 757(554) | 760(564) | 705(530) | 897(642)   | 1532(1091) | 776(544) | 675(466)  | 1273(933)  | 929(662)  | 657(443) |
| Ex 8  | 257(179) | 370(298)  | 243(182) | 370(270)  | 257(207) | 264(207) | 303(249) | 270(213) | 327(248)  | 313(255) | 209(152)  | 238(187) | 193(147) | 273(220)  | 406(305)   | 95(76)   | 244(188) | 194(147) | 137(107) | 292(226)  | 275(232) | 222(179) | 193(146) | 271(217) | 231(172) | 239(162) | 260(196)   | 449(339)   | 214(163) | 264(192)  | 474(338)   | 299(203)  | 190(143) |
| Ex 9  | 502(280) | 639(322)  | 613(350) | 849(476)  | 606(352) | 713(441) | 762(480) | 573(350) | 723(394)  | 595(322) | 795(453)  | 600(346) | 496(285) | 733(411)  | 966(619)   | 234(122) | 530(316) | 463(293) | 279(163) | 566(322)  | 640(373) | 480(262) | 377(211) | 688(403) | 453(240) | 465(263) | 713(377)   | 1021(534)  | 367(213) | 506(267)  | 967(561)   | 682(374)  | 431(238) |
| Ex 10 | 328(265) | 447(379)  | 281(218) | 431(347)  | 330(262) | 275(228) | 374(322) | 263(214) | 366(313)  | 304(244) | 571(480)  | 330(274) | 391(309) | 366(318)  | 551(479)   | 288(247) | 298(252) | 321(278) | 214(184) | 364(293)  | 358(298) | 271(222) | 227(186) | 378(308) | 317(255) | 288(239) | 467(385)   | 256(205)   | 384(311) | 302(255)  | 696(561)   | 527(439)  | 283(234) |
| Ex 11 | 551(380) | 749(496)  | 526(352) | 832(616)  | 565(404) | 609(453) | 644(484) | 546(409) | 631(464)  | 628(477) | 1042(783) | 654(477) | 548(399) | 733(569)  | 1041(806)  | 462(376) | 592(452) | 624(496) | 389(309) | 632(482)  | 693(466) | 384(279) | 416(302) | 720(513) | 478(341) | 459(338) | 767(583)   | 548(398)   | 409(302) | 569(444)  | 1231(948)  | 878(653)  | 468(350) |
| Ex 12 | 496(336) | 675(412)  | 547(382) | 735(539)  | 530(370) | 572(389) | 612(418) | 437(298) | 574(385)  | 605(447) | 776(532)  | 628(457) | 414(295) | 627(440)  | 919(601)   | 339(244) | 544(371) | 539(401) | 304(202) | 629(452)  | 614(442) | 476(341) | 466(335) | 584(426) | 650(485) | 551(379) | 661(484)   | 1306(945)  | 476(353) | 512(350)  | 1097(822)  | 890(674)  | 502(371) |
| Ex 13 | 508(154) | 725(226)  | 494(134) | 801(268)  | 554(166) | 659(211) | 730(275) | 574(191) | 635(224)  | 528(173) | 664(247)  | 583(201) | 510(152) | 685(225)  | 282(94)    | 558(180) | 533(187) | 316(88)  | 614(198) | 601(203)  | 403(131) | 472(148) | 573(181) | 510(183) | 482(134) | 710(229) | 1091(357)  | 454(134)   | 531(167) | 955(316)  | 662(203)   | 436(129)  |          |
| Ex 14 | 345(247) | 483(367)  | 406(287) | 653(490)  | 375(273) | 463(344) | 498(383) | 447(367) | 520(392)  | 394(293) | 649(481)  | 447(328) | 353(256) | 533(377)  | 752(575)   | 123(98)  | 408(273) | 376(265) | 223(155) | 442(329)  | 457(335) | 360(255) | 222(139) | 471(321) | 302(210) | 357(255) | 429(295)   | 725(504)   | 283(205) | 429(308)  | 809(538)   | 446(275)  | 303(220) |
| Ex 15 | 596(373) | 755(533)  | 698(413) | 994(649)  | 635(425) | 801(574) | 785(512) | 477(327) | 762(549)  | 603(373) | 876(553)  | 771(538) | 567(389) | 811(603)  | 1208(877)  | 155(107) | 525(363) | 668(485) | 248(170) | 547(379)  | 785(534) | 479(303) | 345(226) | 706(481) | 436(287) | 561(369) | 901(541)   | 1428(937)  | 282(174) | 696(486)  | 1214(806)  | 1002(656) | 487(334) |
| Ex 16 | 768(549) | 1061(897) | 850(604) | 1216(860) | 818(541) | 928(774) | 987(854) | 888(755) | 1007(856) | 876(672) | 986(776)  | 966(756) | 738(586) | 1078(869) | 1561(1262) | 155(127) | 874(690) | 746(580) | 502(405) | 1020(806) | 873(641) | 647(477) | 572(382) | 923(613) | 810(606) | 770(573) | 1006(732)  | 1570(1150) | 654(482) | 855(657)  | 1564(1142) | 1026(721) | 640(485) |
| Ex 17 | 573(392) | 776(563)  | 734(492) | 1046(742) | 694(438) | 752(558) | 873(650) | 623(443) | 774(549)  | 720(507) | 835(557)  | 748(506) | 500(348) | 808(558)  | 1186(857)  | 109(78)  | 635(468) | 553(376) | 331(232) | 701(509)  | 715(501) | 443(292) | 529(357) | 704(464) | 575(426) | 573(406) | 794(570)   | 1289(916)  | 388(266) | 724(513)  | 1303(883)  | 991(681)  | 465(289) |
| Ex 18 | 418(278) | 642(472)  | 417(277) | 555(374)  | 436(302) | 414(295) | 552(418) | 433(332) | 507(365)  | 445(308) | 661(476)  | 527(383) | 501(353) | 562(414)  | 887(653)   | 409(276) | 444(319) | 434(308) | 307(224) | 485(356)  | 540(388) | 380(253) | 399(272) | 496(330) | 498(336) | 509(368) | 577(385)   | 413(263)   | 572(418) | 445(334)  | 859(585)   | 683(449)  | 420(291) |
| Ex 19 | 257(151) | 334(134)  | 235(136) | 364(220)  | 257(149) | 220(85)  | 295(115) | 204(80)  | 271(115)  | 293(151) | 250(124)  | 250(116) | 202(102) | 327(146)  | 478(226)   | 207(93)  | 254(108) | 272(112) | 186(95)  | 290(131)  | 303(187) | 176(102) | 210(130) | 255(142) | 226(129) | 197(101) | 334(193)   | 527(279)   | 189(111) | 222(111)  | 477(245)   | 468(253)  | 203(120) |
| Ex 20 | 346(159) | 431(249)  | 292(135) | 452(229)  | 335(159) | 338(182) | 365(221) | 248(144) | 397(229)  | 358(174) | 546(254)  | 350(191) | 309(155) | 448(238)  | 571(286)   | 272(163) | 322(172) | 341(190) | 243(134) | 386(202)  | 407(187) | 223(113) | 262(110) | 356(182) | 292(154) | 311(139) | 438(212)   | 690(353)   | 246(125) | 347(157)  | 665(295)   | 512(242)  | 248(128) |
| Ex 21 | 234(152) | 340(248)  | 297(204) | 400(299)  | 264(191) | 263(200) | 286(204) | 271(188) | 358(248)  | 338(239) | 265(188)  | 300(210) | 281(211) | 326(236)  | 497(350)   | 224(163) | 246(180) | 264(194) | 207(159) | 363(264)  | 325(233) | 297(207) | 256(182) | 290(196) | 303(221) | 252(176) | 409(283)   | 553(365)   | 292(207) | 283(207)  | 504(329)   | 375(240)  | 254(180) |
| Ex 22 | 183(77)  | 242(105)  | 163(66)  | 249(100)  | 201(87)  | 135(60)  | 189(90)  | 121(53)  | 209(73)   | 242(103) | 142(57)   | 167(74)  | 180(73)  | 237(112)  | 314(144)   | 145(57)  | 153(59)  | 167(74)  | 103(51)  | 247(112)  | 220(90)  | 124(54)  | 142(54)  | 204(70)  | 140(52)  | 122(54)  | 233(120)   | 424(171)   | 93(44)   | 159(72)   | 371(141)   | 279(106)  | 120(56)  |
| Ex 23 | 150(98)  | 266(196)  | 152(115) | 200(143)  | 172(128) | 142(103) | 199(140) | 172(107) | 189(133)  | 264(194) | 162(108)  | 177(138) | 158(119) | 209(152)  | 343(243)   | 174(122) | 165(121) | 201(152) | 103(63)  | 227(161)  | 198(143) | 130(72)  | 133(93)  | 182(123) | 142(101) | 130(93)  | 230(173)   | 361(254)   | 175(126) | 171(124)  | 422(292)   | 247(154)  | 134(90)  |
| Ex 24 | 395(294) | 504(286)  | 503(398) | 612(464)  | 463(346) | 511(319) | 585(345) | 434(265) | 510(295)  | 420(282) | 665(440)  | 561(384) | 542(370) | 598(404)  | 940(590)   | 446(309) | 426(300) | 430(286) | 306(211) | 510(340)  | 567(435) | 477(365) | 364(280) | 545(402) | 479(360) | 450(339) | 681(525)   | 542(414)   | 496(395) | 454(295)  | 764(487)   | 654(500)  | 462(340) |
| Ex 25 | 275(159) | 441(266)  | 301(165) | 438(263)  | 312(171) | 357(202) | 413(249) | 338(208) | 355(194)  | 292(169) | 549(339)  | 366(211) | 448(251) | 580(315)  | 633(402)   | 485(296) | 340(223) | 313(182) | 240(172) | 335(215)  | 466(318) | 342(161) | 241(145) | 339(195) | 276(158) | 290(170) | 339(232)   | 540(321)   | 339(202) | 320(189)  | 580(370)   | 394(234)  | 286(184) |
| Ex 26 | 529(379) | 711(597)  | 513(384) | 738(554)  | 560(414) | 506(417) | 667(572) | 537(460) | 613(506)  | 576(463) | 914(707)  | 571(439) | 498(393) | 611(489)  | 960(741)   | 234(190) | 493(382) | 614(465) | 322(265) | 575(449)  | 696(511) | 405(304) | 427(309) | 662(507) | 557(416) | 454(334) | 765(566)   | 508(396)   | 441(347) | 513(380)  | 1097(847)  | 978(732)  | 457(348) |
| Ex 27 | 279(120) | 339(154)  | 275(112) | 419(167)  | 297(145) | 307(137) | 313(141) | 270(120) | 354(143)  | 297(129) | 388(177)  | 291(148) | 207(89)  | 396(174)  | 441(201)   | 154(58)  | 273(139) | 279(118) | 169(74)  | 283(117)  | 331(172) | 222(95)  | 209(102) | 326(130) | 237(101) | 248(105) | 365(164)   | 552(264)   | 177(74)  | 332(146)  | 605(258)   | 398(165)  | 196(87)  |
| Ex 28 | 413(191) | 703(423)  | 549(286) | 734(336)  | 494(235) | 630(366) | 721(405) | 645(367) | 614(332)  | 465(215) | 817(357)  | 677(320) | 735(362) | 843(455)  | 1138(634)  | 734(397) | 652(309) | 542(279) | 357(177) | 585(293)  | 633(266) | 528(206) | 432(181) | 585(283) | 574(233) | 562(315) | 739(297)   | 1125(515)  | 521(251) | 495(279)  | 974(435)   | 824(409)  | 479(209) |
| Ex 29 | 441(294) | 641(432)  | 478(328) | 684(456)  | 482(312) | 517(328) | 565(382) | 507(324) | 613(426)  | 526(364) | 522(357)  | 560(370) | 487(320) | 657(461)  | 919(628)   | 326(210) | 449(289) | 414(267) | 265(177) | 546(371)  | 523(357) | 449(285) | 395(246) | 587(393) | 442(248) | 434(266) | 576(361)   | 854(566)   | 331(215) | 490(309)  | 827(494)   | 674(411)  | 352(243) |
| Ex 30 | 276(188) | 444(276)  | 346(239) | 423(279)  | 313(217) | 333(210) | 429(293) | 315(194) | 336(219)  | 318(216) | 550(395)  | 368(246) | 476(319) | 461(316)  | 725(519)   | 520(335) | 397(286) | 342(227) | 234(167) | 368(255)  | 412(272) | 260(174) | 270(185) | 347(240) | 346(237) | 342(236) | 432(304)   | 377(267)   | 286(199) | 347(233)  | 612(446)   | 497(346)  | 305(222) |
| Ex 31 | 229(124) | 397(226)  | 248(130) | 379(216)  | 269(149) | 304(148) | 331(151) | 239(130) | 335(178)  | 294(177) | 527(263)  | 352(181) | 263(125) | 415(210)  | 527(276)   | 283(125) | 267(141) | 315(167) | 209(126) | 307(161)  | 339(177) | 225(95)  | 241(108) | 330(170) | 246(131) | 255(138) | 332(162)   | 660(356)   | 186(105) | 297(200)  | 562(274)   | 521(260)  | 232(118) |
| Ex 32 | 467(358) | 676(462)  | 518(408) | 800(619)  | 553(412) | 591(466) | 639(478) | 507(397) | 6         |          |           |          |          |           |            |          |          |          |          |           |          |          |          |          |          |          |            |            |          |           |            |           |          |



COL445  
Exon number

|       |          |           |          |          |          |           |          |          |           |          |          |          |          |           |           |           |          |          |          |           |          |          |          |          |          |          |          |           |          |            |            |          |          |
|-------|----------|-----------|----------|----------|----------|-----------|----------|----------|-----------|----------|----------|----------|----------|-----------|-----------|-----------|----------|----------|----------|-----------|----------|----------|----------|----------|----------|----------|----------|-----------|----------|------------|------------|----------|----------|
| Ex 1  | 318(217) | 764(549)  | 420(289) | 6(2)*    | 687(429) | 776(547)  | 411(313) | 377(320) | 793(616)  | 603(454) | 577(385) | 479(364) | 549(412) | 1213(903) | 820(576)  | 1241(936) | 343(279) | 611(423) | 449(316) | 716(527)  | 468(304) | 732(480) | 659(444) | 491(332) | 442(297) | 862(572) | 480(313) | 785(539)  | 420(269) | 366(265)   | 1178(754)  | 566(380) | 366(255) |
| Ex 2  | 378(329) | 837(701)  | 400(306) | 4(2)*    | 751(598) | 887(692)  | 462(380) | 374(306) | 908(752)  | 694(562) | 590(483) | 469(371) | 342(261) | 903(729)  | 725(603)  | 274(224)  | 372(318) | 684(553) | 397(336) | 765(639)  | 448(371) | 725(572) | 539(426) | 455(372) | 367(301) | 727(589) | 57(47)   | 755(617)  | 297(259) | 416(343)   | 1416(1183) | 546(437) | 322(267) |
| Ex 3  | 314(244) | 835(666)  | 403(313) | 583(426) | 774(573) | 945(697)  | 541(396) | 425(274) | 965(699)  | 652(496) | 627(500) | 501(367) | 449(335) | 988(756)  | 700(544)  | 568(408)  | 370(279) | 756(580) | 481(372) | 782(580)  | 451(351) | 700(559) | 566(407) | 401(320) | 394(304) | 711(568) | 68(36)   | 752(588)  | 368(289) | 424(320)   | 1266(1000) | 545(430) | 335(261) |
| Ex 4  | 187(155) | 593(505)  | 293(256) | 413(347) | 577(500) | 515(442)  | 264(223) | 219(169) | 558(489)  | 514(449) | 417(344) | 267(231) | 302(243) | 574(514)  | 489(394)  | 374(327)  | 230(189) | 468(382) | 347(279) | 564(495)  | 301(269) | 492(429) | 414(362) | 300(243) | 245(208) | 513(419) | 45(37)   | 218(168)  | 285(239) | 263(224)   | 974(816)   | 353(301) | 205(179) |
| Ex 5  | 208(174) | 589(460)  | 245(182) | 386(284) | 470(382) | 578(463)  | 289(225) | 276(195) | 545(420)  | 511(398) | 320(261) | 288(242) | 227(171) | 638(508)  | 450(371)  | 241(189)  | 226(180) | 470(400) | 277(235) | 573(474)  | 287(240) | 399(324) | 286(233) | 276(237) | 205(169) | 412(326) | 24(16)   | 469(383)  | 202(165) | 235(185)   | 866(767)   | 306(267) | 179(160) |
| Ex 6  | 181(113) | 483(346)  | 202(141) | 315(229) | 425(292) | 465(326)  | 261(194) | 214(163) | 458(346)  | 409(276) | 315(223) | 257(179) | 194(156) | 533(364)  | 427(314)  | 178(130)  | 198(144) | 381(244) | 256(170) | 474(338)  | 252(175) | 412(291) | 264(181) | 270(171) | 192(125) | 336(216) | 17(9)    | 426(309)  | 193(132) | 190(127)   | 789(515)   | 252(150) | 185(138) |
| Ex 7  | 285(194) | 659(521)  | 334(225) | 440(314) | 542(423) | 597(489)  | 388(320) | 250(203) | 643(510)  | 622(467) | 410(299) | 327(236) | 250(193) | 687(528)  | 558(446)  | 343(266)  | 317(236) | 616(461) | 352(258) | 599(443)  | 369(272) | 448(295) | 436(294) | 379(262) | 287(188) | 500(357) | 59(41)   | 324(222)  | 214(157) | 327(252)   | 1112(760)  | 436(312) | 225(158) |
| Ex 8  | 246(128) | 729(365)  | 308(128) | 391(192) | 530(235) | 703(352)  | 424(189) | 356(181) | 615(338)  | 496(222) | 354(152) | 328(156) | 341(173) | 739(364)  | 636(302)  | 406(187)  | 329(157) | 563(293) | 368(209) | 619(286)  | 339(152) | 549(232) | 437(197) | 308(129) | 321(153) | 606(255) | 54(18)   | 659(314)  | 267(121) | 266(125)   | 932(401)   | 366(158) | 231(97)  |
| Ex 9  | 300(239) | 662(532)  | 390(308) | 460(380) | 590(475) | 680(522)  | 421(327) | 306(224) | 713(585)  | 603(471) | 458(377) | 418(337) | 395(311) | 765(590)  | 622(495)  | 599(452)  | 332(275) | 591(478) | 414(321) | 657(520)  | 392(325) | 634(514) | 505(427) | 397(327) | 371(292) | 674(555) | 63(51)   | 428(348)  | 342(277) | 351(286)   | 966(791)   | 465(383) | 305(240) |
| Ex 10 | 216(164) | 455(329)  | 238(190) | 313(257) | 414(352) | 424(330)  | 278(208) | 179(130) | 487(361)  | 403(332) | 273(214) | 226(169) | 239(194) | 443(340)  | 394(309)  | 91(73)    | 184(151) | 390(308) | 222(173) | 405(325)  | 205(171) | 331(266) | 204(166) | 187(152) | 171(147) | 274(218) | 19(16)   | 174(143)  | 158(132) | 201(157)   | 664(510)   | 252(205) | 121(90)  |
| Ex 11 | 274(242) | 604(485)  | 273(241) | 383(355) | 514(480) | 639(521)  | 359(298) | 266(216) | 631(509)  | 562(503) | 399(354) | 297(270) | 230(207) | 637(581)  | 465(420)  | 158(136)  | 272(240) | 547(510) | 305(284) | 589(538)  | 302(281) | 348(309) | 296(278) | 288(265) | 244(224) | 418(368) | 37(32)   | 312(287)  | 187(157) | 311(277)   | 962(887)   | 382(337) | 208(181) |
| Ex 12 | 476(408) | 1019(883) | 488(412) | 711(617) | 889(758) | 958(805)  | 560(483) | 409(329) | 1041(896) | 974(842) | 568(475) | 492(398) | 375(316) | 1118(964) | 843(713)  | 326(274)  | 408(328) | 782(643) | 460(371) | 942(814)  | 547(473) | 711(604) | 646(537) | 528(442) | 438(379) | 801(682) | 67(54)   | 1042(925) | 320(280) | 466(382)   | 1722(1485) | 637(546) | 368(318) |
| Ex 13 | 132(51)  | 291(130)  | 104(38)  | 174(75)  | 273(127) | 227(69)   | 156(58)  | 97(35)   | 286(118)  | 303(134) | 115(24)  | 110(44)  | 67(18)   | 299(125)  | 192(73)   | 85(32)    | 113(46)  | 203(87)  | 129(52)  | 285(134)  | 152(71)  | 175(71)  | 174(73)  | 124(54)  | 84(32)   | 180(70)  | 15(5)    | 254(94)   | 62(25)   | 132(53)    | 511(201)   | 170(67)  | 77(26)   |
| Ex 14 | 320(231) | 742(558)  | 372(277) | 633(466) | 684(496) | 872(659)  | 518(394) | 401(297) | 834(591)  | 717(556) | 619(431) | 429(296) | 310(235) | 947(691)  | 667(492)  | 419(320)  | 339(238) | 612(435) | 360(246) | 774(564)  | 424(314) | 593(449) | 461(334) | 412(296) | 305(216) | 622(443) | 57(42)   | 668(482)  | 254(189) | 352(246)   | 1261(908)  | 398(275) | 293(237) |
| Ex 15 | 259(215) | 583(496)  | 324(272) | 519(423) | 538(458) | 749(632)  | 395(349) | 316(280) | 673(566)  | 545(457) | 483(382) | 349(279) | 231(193) | 767(671)  | 524(460)  | 281(243)  | 268(220) | 569(474) | 345(280) | 623(524)  | 328(275) | 454(386) | 371(307) | 337(272) | 250(205) | 518(435) | 40(32)   | 590(509)  | 188(158) | 311(260)   | 1059(886)  | 356(285) | 203(174) |
| Ex 16 | 175(148) | 425(349)  | 165(147) | 278(246) | 351(317) | 382(323)  | 225(205) | 163(139) | 458(373)  | 400(351) | 187(155) | 173(147) | 124(106) | 453(382)  | 388(318)  | 51(39)    | 170(158) | 338(280) | 234(205) | 390(330)  | 191(152) | 261(211) | 276(241) | 204(162) | 158(124) | 279(239) | 26(23)   | 381(309)  | 110(85)  | 217(175)   | 641(525)   | 245(203) | 123(107) |
| Ex 17 | 226(123) | 619(393)  | 280(169) | 378(232) | 461(255) | 612(367)  | 393(235) | 283(165) | 564(351)  | 484(304) | 411(231) | 316(185) | 281(158) | 700(397)  | 594(361)  | 431(255)  | 317(184) | 548(318) | 318(190) | 536(322)  | 295(165) | 324(174) | 323(167) | 246(137) | 237(129) | 446(258) | 39(25)   | 449(226)  | 180(106) | 331(188)   | 795(433)   | 426(238) | 201(117) |
| Ex 18 | 328(84)  | 981(308)  | 433(131) | 535(153) | 707(190) | 995(318)  | 558(214) | 449(160) | 848(267)  | 610(189) | 616(218) | 486(173) | 362(118) | 799(270)  | 905(285)  | 410(123)  | 365(123) | 693(229) | 449(127) | 742(247)  | 449(150) | 616(194) | 632(196) | 358(115) | 370(108) | 779(262) | 72(22)   | 824(888)  | 302(82)  | 418(123)   | 1075(318)  | 542(151) | 293(101) |
| Ex 19 | 338(253) | 849(679)  | 516(360) | 667(456) | 777(524) | 998(718)  | 578(435) | 427(290) | 950(802)  | 744(575) | 772(571) | 548(441) | 403(288) | 1013(766) | 757(583)  | 408(311)  | 619(555) | 420(327) | 872(687) | 542(424)  | 733(525) | 642(474) | 506(360) | 407(324) | 764(594) | 62(45)   | 871(683) | 295(219)  | 405(328) | 1471(1162) | 531(427)   | 300(226) |          |
| Ex 20 | 119(55)  | 274(176)  | 97(47)   | 151(73)  | 230(152) | 231(117)  | 140(80)  | 85(29)   | 251(123)  | 246(114) | 160(66)  | 107(45)  | 121(53)  | 321(179)  | 204(116)  | 205(99)   | 102(60)  | 213(102) | 142(70)  | 249(181)  | 121(58)  | 201(80)  | 135(53)  | 103(35)  | 181(83)  | 17(6)    | 221(92)  | 76(30)    | 100(58)  | 408(176)   | 155(71)    | 72(43)   |          |
| Ex 21 | 132(91)  | 383(255)  | 133(91)  | 195(132) | 302(216) | 266(180)  | 167(116) | 117(94)  | 273(192)  | 308(218) | 160(106) | 115(70)  | 141(98)  | 360(236)  | 232(145)  | 163(128)  | 143(88)  | 304(205) | 191(125) | 345(222)  | 143(101) | 225(155) | 199(125) | 148(110) | 131(76)  | 254(192) | 34(24)   | 277(179)  | 107(56)  | 150(96)    | 603(378)   | 219(137) | 109(59)  |
| Ex 22 | 374(238) | 899(592)  | 508(332) | 617(369) | 764(492) | 927(617)  | 535(353) | 479(324) | 874(570)  | 616(406) | 783(515) | 589(399) | 487(325) | 949(622)  | 931(596)  | 851(560)  | 407(256) | 836(534) | 552(347) | 806(520)  | 560(375) | 890(588) | 634(420) | 398(258) | 491(296) | 919(598) | 95(64)   | 949(593)  | 491(293) | 410(263)   | 1180(768)  | 612(381) | 386(245) |
| Ex 23 | 240(163) | 651(459)  | 335(226) | 427(279) | 523(387) | 713(514)  | 384(305) | 301(233) | 692(484)  | 564(453) | 419(286) | 352(228) | 327(234) | 756(576)  | 262(469)  | 180(119)  | 367(295) | 635(459) | 362(249) | 640(492)  | 352(232) | 489(327) | 421(294) | 320(204) | 313(231) | 518(349) | 486(341) | 432(306)  | 217(160) | 346(242)   | 1013(683)  | 412(280) | 246(175) |
| Ex 24 | 238(164) | 789(322)  | 418(218) | 567(266) | 641(311) | 842(334)  | 494(236) | 377(161) | 803(368)  | 726(361) | 647(286) | 469(206) | 440(198) | 1042(461) | 864(365)  | 674(280)  | 424(176) | 723(329) | 456(196) | 744(316)  | 468(242) | 647(324) | 537(263) | 443(229) | 384(174) | 719(351) | 532(252) | 536(234)  | 275(132) | 457(205)   | 1187(582)  | 593(298) | 300(152) |
| Ex 25 | 220(102) | 518(259)  | 277(144) | 339(162) | 461(251) | 551(288)  | 376(180) | 275(117) | 560(249)  | 514(256) | 388(175) | 306(147) | 211(118) | 740(317)  | 511(242)  | 458(284)  | 253(126) | 464(232) | 320(149) | 556(254)  | 299(150) | 421(201) | 378(203) | 308(157) | 501(234) | 328(166) | 576(260) | 188(79)   | 257(125) | 865(417)   | 329(179)   | 211(96)  |          |
| Ex 26 | 109(65)  | 372(273)  | 148(90)  | 195(122) | 246(166) | 282(195)  | 153(105) | 116(89)  | 341(214)  | 318(211) | 160(101) | 117(77)  | 91(64)   | 373(259)  | 229(164)  | 108(69)   | 130(89)  | 243(162) | 125(85)  | 338(220)  | 151(102) | 188(120) | 163(107) | 137(78)  | 121(71)  | 237(145) | 276(182) | 265(149)  | 67(41)   | 149(100)   | 473(299)   | 200(131) | 99(63)   |
| Ex 27 | 255(132) | 662(360)  | 330(195) | 482(265) | 581(353) | 647(385)  | 402(254) | 299(184) | 665(372)  | 606(319) | 398(220) | 360(218) | 288(171) | 813(444)  | 587(314)  | 193(99)   | 259(150) | 448(267) | 278(151) | 661(374)  | 379(224) | 480(275) | 496(292) | 356(213) | 267(161) | 582(343) | 658(385) | 641(359)  | 204(119) | 310(170)   | 1020(581)  | 495(288) | 223(129) |
| Ex 28 | 249(93)  | 665(218)  | 304(130) | 426(157) | 538(213) | 631(227)  | 388(162) | 282(110) | 641(253)  | 582(237) | 459(165) | 338(124) | 266(102) | 780(331)  | 619(252)  | 471(192)  | 289(112) | 537(191) | 328(147) | 600(231)  | 336(133) | 413(155) | 466(197) | 319(131) | 279(109) | 489(178) | 642(212) | 704(287)  | 172(70)  | 309(126)   | 966(330)   | 415(160) | 216(73)  |
| Ex 29 | 402(238) | 1080(764) | 482(318) | 678(447) | 882(527) | 1062(700) | 631(447) | 497(337) | 1004(636) | 839(518) | 762(497) | 625(423) | 597(412) | 1287(776) | 1059(668) | 860(529)  | 495(298) | 860(525) | 570(325) | 1004(628) | 575(346) | 856(498) | 736(433) | 563(359) | 493(271) | 945(581) | 744(445) | 656(391)  | 442(249) | 502(308)   | 1405(776)  | 754(417) | 379(234) |
| Ex 30 | 396(264) | 882(634)  | 451(334) | 637(444) | 831(618) | 977(744)  | 611(472) | 434(337) | 894(637)  | 748(521) | 675(473) | 545(394) | 493(346) | 1080(711) | 907(634)  | 730(516)  | 489(352) | 846(576) | 520(361) | 896(665)  | 499(356) | 744(484) | 692(478) | 510(345) | 503(326) | 769(521) | 659(472) | 639(453)  | 378(263) | 477(320)   | 1302(894)  | 515(317) | 375(268) |
| Ex 31 | 171(136) | 393(317)  | 158(113) | 270(210) | 368(280) | 531(262)  | 204(161) | 166(136) | 412(328)  | 362(269) | 282(198) | 200(162) | 137(1    |           |           |           |          |          |          |           |          |          |          |          |          |          |          |           |          |            |            |          |          |

Supplementary Table 3: variants of unknown significance identified in that study, prediction of deleterious effect according to PolyPhen and SIFT programs, and frequency in public databases.

| Gene          | Nucleotide change | Protein change | PolyPhen2         | SIFT   | 1000Genomes | EVS      |
|---------------|-------------------|----------------|-------------------|--------|-------------|----------|
| <i>COL4A3</i> | c.346C>A          | p.Pro116Thr    | probably damaging | benign | 0.005       | 104/1403 |
| <i>COL4A4</i> | c.919C>T          | p.Pro307Ser    | probably damaging | benign | 0           | 0        |
| <i>COL4A5</i> | c.4054C>A         | p.Leu1352Ile   | benign            | benign | 1/1658      | 3/10560  |
| <i>COL4A3</i> | c.988-6C>T        |                |                   |        | 0           | 0        |
| <i>COL4A3</i> | c.2981-76C>T      |                |                   |        | 0           | 0        |
| <i>COL4A4</i> | c.114G>A          | p.Gly38Gly     |                   |        | 0           | 0        |
